# Supplementary material for: In healthy eyes, the accuracy and interchangeability of corneal tomography measurements obtained by Galilei G6 and Pentacom HR systems are compared
Source: Research Square preprint supplement (doi:10.21203/rs.3.rs-8026210/v1), 2025-12-09
Supplement: Supplementary file 1 [file 1bc1601edfcb6ce5b05bf8eb.xlsx]

## Sheet: Pentacam and Qalili.V6.sav.2
ID	Deviaces	Eye	Sex	Age	K1	K2	Kmx	Q.Value	Pupil.center	Pachy.Apex	CCT	ACD	WTW	Pupil.Dia	Cornea.Vol	Chamber.Vol
1	1	1.00	2	18	43	42	42.5	-0.41	509	511	503	2.37	11.4	2.78	61.9	151
2	1	1.00	2	18	44.74	44.2	44.47	-0.43	519	518	514	3.26	11.8	2.27	57.6	212
3	1	1.00	2	19	43.5	46.3	44.9	-0.33	528	527	524	3.41	12	7.19	61.6	213
4	1	1.00	1	18	40.9	44.9	42.9	-0.27	564	566	560	3.13	12.2	1.93	62.5	184
5	1	1.00	1	19	43.7	45.3	44.5	-0.31	528	529	524	3.9	11.8	2.11	60.5	175
6	1	1.00	2	19	42.8	43.1	42.95	-0.38	534	531	519	3.19	11.8	2.88	58.7	184
7	1	1.00	1	20	43.1	43.6	43.35	-0.38	523	524	519	3.1	11.4	4.43	58	201
8	1	1.00	1	20	41	44.8	42.9	-0.39	526	527	521	3.09	12.1	3.06	59.9	192
9	1	1.00	2	20	42.9	43.5	43.2	-0.31	538	536	533	3.1	11.7	2.18	60.6	153
10	1	1.00	1	19	41.9	42.6	42.25	-0.36	553	552	549	3.22	11.6	2.44	64.3	174
11	1	1.00	2	20	40.3	43.1	41.7	-0.29	541	542	539	2.9	11.9	3.43	61.1	187
12	1	1.00	2	20	43	46.9	44.95	-0.43	533	534	525	3.04	11.9	3.29	60.8	177
13	1	1.00	2	21	43.2	44.1	43.65	-0.16	465	467	460	3.43	11.7	4.03	53.3	196
14	1	1.00	1	21	42.9	47.3	45.1	-0.33	517	515	513	3.63	12.3	2.71	60	223
15	1	1.00	1	22	42.8	45.3	44.05	-0.33	522	522	519	3.31	11.8	2.51	60.4	190
16	1	1.00	2	23	40.4	41.4	40.9	-0.14	538	540	532	3.2	11.8	4.25	60.7	167
17	1	1.00	2	23	42.1	44	43.05	-0.45	558	558	555	3.1	11.7	4.08	60.9	196
18	1	1.00	2	23	43.5	44.7	44.1	-0.49	546	546	541	3.2	11.6	2.42	62.3	192
19	1	1.00	1	25	42.1	43.8	42.95	-0.19	532	533	530	3.22	12.1	2.48	59.7	224
20	1	1.00	1	25	43.7	44.5	44.1	-0.16	528	570	521	3.06	12.1	3.5	60	193
21	1	1.00	2	25	43.9	45.3	44.6	-0.3	540	542	535	3.17	11.8	3.98	63.9	183
22	1	1.00	1	25	45.4	46.1	45.75	-0.26	540	539	534	3.44	11.4	2.66	62.9	177
23	1	1.00	1	26	42.3	45.7	44	-0.23	539	539	535	3.34	11.8	2.73	61.7	189
24	1	1.00	2	26	42.4	43.8	43.1	-0.23	550	552	547	3.23	11.6	3.41	62	206
25	1	1.00	1	28	41.4	42.6	42	-0.47	542	543	540	3.18	11.9	2.9	60.1	208
26	1	1.00	2	28	42.9	43.8	43.35	-0.32	535	534	531	3.11	11.8	2.12	60.7	181
27	1	1.00	1	29	43.8	44.2	44	-0.48	565	570	563	2.28	11.4	2.59	64.3	167
28	1	1.00	2	29	40.4	40.44	40.42	-1.09	464	463	460	2.81	12.2	2.9	53.8	151
29	1	1.00	2	29	42.2	42.8	42.5	-0.2	530	532	525	3.16	12.2	2.9	58.7	197
30	1	1.00	2	30	44.8	45.5	45.15	-0.3	506	505	500	3.33	11.4	2.68	59.7	194
31	1	1.00	2	31	45.8	46.5	46.15	-0.3	512	512	505	3.08	11.1	3.73	59.4	161
32	1	1.00	2	31	45.8	46.5	46.15	-0.3	512	512	505	3.08	11.1	3.73	59.4	161
33	1	1.00	1	33	43.5	44.7	44.1	-0.34	504	505	500	3.32	11.6	2.97	55.8	217
34	1	1.00	2	33	43.7	44.9	44.3	-0.29	494	494	490	3.38	12	2.43	56.1	224
35	1	1.00	2	33	44.9	46	45.45	-0.38	549	550	548	3.08	11.5	2.46	61.9	168
36	1	1.00	1	34	42	42.3	42.15	-0.24	551	550	547	3.58	12.2	3.88	59.9	255
37	1	1.00	2	34	42.5	43	42.75	-0.46	549	549	547	3.1	11.9	3.83	60.2	203
38	1	1.00	2	35	43.4	44.1	43.75	-0.14	555	555	551	3.33	12.2	2.49	58.75	204
39	1	1.00	2	35	43	44.3	43.65	-0.24	532	529	526	3.33	12.2	3.07	58.8	216
40	1	1.00	2	35	43.4	44.1	43.75	-0.14	555	555	551	3.33	12.2	2.49	60.8	204
41	1	1.00	2	35	43	44.3	43.65	-0.24	532	529	526	3.33	12.2	3.07	58.8	216
42	1	1.00	1	36	43.3	50.1	46.7	-0.34	508	509	503	2.41	11.5	2.86	61.9	123
43	1	1.00	1	36	42.3	42.5	42.4	-0.27	543	541	540	3.44	11.8	2.32	56.8	214
44	1	1.00	1	36	43.2	43.3	43.25	-0.16	537	537	535	3.14	11.9	3.05	59.5	200
45	1	1.00	1	39	43.8	44.7	44.25	-0.38	489	491	483	2.85	14.4	2.57	56.2	185
46	1	1.00	1	39	43.8	44.7	44.25	-0.38	489	491	483	2.85	14.4	2.57	56.2	185
47	1	1.00	2	44	43.7	44	43.85	-0.33	548	549	547	2.59	11.4	1.98	60.2	147
48	1	1.00	2	47	45.7	46.1	45.9	-0.35	499	499	492	3.4	11.6	2.52	59.5	199
49	1	1.00	2	47	44.7	45	44.85	-0.25	561	566	556	2.92	11.1	2.35	63.1	165
50	1	1.00	2	47	45.7	46.1	45.9	-0.35	499	499	492	3.4	11.6	2.52	59.5	199
51	1	1.00	2	47	44.7	45	44.85	-0.25	561	566	556	2.92	11.1	2.35	63.1	165
52	2	1.00	2	#NULL!	43.8	42.28	43.04	0.13	567	609	551	2.86	11.4	2.88	32	135
53	2	1.00	2	#NULL!	44.61	45.59	45.1	0.06	493	541	480	3.4	12.6	4.16	28.5	176
54	2	1.00	2	#NULL!	43.59	42.92	43.255	-0.04	596	642	580	2.68	12.22	3.91	33.6	193
55	2	1.00	1	#NULL!	40.94	42.64	41.79	0.25	486	530	475	3.25	12.05	4.12	27.9	179
56	2	1.00	1	#NULL!	43.79	44.39	44.09	0	542	593	529	3.35	12.85	2.56	31.2	143
57	2	1.00	2	#NULL!	43.05	44.32	43.685	0.05	449	545	490	3.28	12.19	3.24	28.6	148
58	2	1.00	1	#NULL!	43.19	45.17	44.18	0.29	554	594	543	3.41	12.06	3.75	31.2	179
59	2	1.00	1	#NULL!	41.91	42.69	42.3	0.19	564	599	555	3.61	11.89	5.08	31.4	184
60	2	1.00	2	#NULL!	43.1	42.95	43.025	0.14	563	506	552	3.24	12.62	4.21	31.7	148
61	2	1.00	1	#NULL!	41.97	44.67	43.32	0.32	488	530	477	3.14	12.6	3.32	27.8	158
62	2	1.00	2	#NULL!	40.33	43.13	41.73	0.02	547	593	536	3.22	11.97	3.61	31.2	112
63	2	1.00	2	#NULL!	42.89	46.66	44.775	-0.68	540	542	532	3.04	11.6	3.46	61.43	152.49
64	2	1.00	2	#NULL!	43.15	43.84	43.495	-0.14	549	620	534	3.91	12.1	2.53	32.4	182
65	2	1.00	1	#NULL!	42.42	42.62	42.52	-0.1	570	611	556	3.82	12.22	3.31	32	179
66	2	1.00	1	#NULL!	42.62	44.04	43.33	0	524	561	517	2.98	12.68	5.02	29.4	151
67	2	1.00	2	#NULL!	40.5	43.4	41.95	0.05	542	581	530	3.04	12.09	4.37	30.5	137
68	2	1.00	2	#NULL!	42.12	43.9	43.01	-0.52	565	567	560	3.16	12.27	4	61.48	190.86
69	2	1.00	2	#NULL!	43.69	44.82	44.255	-0.4	555	554	546	3.21	11.8	2.76	63.3	160.29
70	2	1.00	1	#NULL!	42.28	44.39	43.335	0.08	541	582	532	3.41	11.9	7.56	30.5	200
71	2	1.00	1	#NULL!	44.01	44.85	44.43	0.28	532	535	523	3.07	12.59	5.28	29.9	148
72	2	1.00	2	#NULL!	43.92	44.15	44.035	0.59	508	562	495	3.3	12.3	4.79	28.8	176
73	2	1.00	1	#NULL!	45.45	46.09	45.77	-0.19	548	548	540	3.32	12.06	2.8	63.04	155.3
74	2	1.00	1	#NULL!	42.21	41.72	41.965	0.12	511	561	500	3.16	12	3.5	29.7	158
75	2	1.00	2	#NULL!	42.28	43.76	43.02	-0.26	560	562	556	3.22	12.63	4.06	63.38	176.5
76	2	1.00	1	#NULL!	41.44	42.57	42.005	-0.48	538	540	532	3.18	12.2	3.23	59.7	165.55
77	2	1.00	2	#NULL!	42.98	43.68	43.33	-0.26	535	534	528	3.14	12	2.36	61.8	139.6
78	2	1.00	1	#NULL!	44.02	44.9	44.46	0.24	560	602	550	3.26	11.8	3.03	31.6	152
79	2	1.00	2	#NULL!	41.73	41.8	41.765	0.1	566	613	553	2.5	12.9	2.45	32.1	139
80	2	1.00	2	#NULL!	42.22	42.87	42.545	-0.2	536	538	527	3.18	12.05	2.84	59.75	161.82
81	2	1.00	2	#NULL!	44.85	45.61	45.23	-0.3	520	518	511	3.38	12.7	2.6	61.63	167.3
82	2	1.00	2	#NULL!	45.85	46.54	46.195	-0.31	520	520	513	3.06	11.6	3.31	62.13	151.7
83	2	1.00	2	#NULL!	45.85	46.54	46.195	-0.31	520	520	513	3.06	11.4	3.31	62.13	151.7
84	2	1.00	1	#NULL!	43.33	44.58	43.955	-0.33	505	506	500	3.34	11.4	3.39	54.04	175.46
85	2	1.00	2	#NULL!	43.68	44.91	44.295	-0.28	504	504	500	3.42	11.8	3.05	57.79	163.51
86	2	1.00	2	#NULL!	44.81	46.02	45.415	-0.42	560	559	556	3.07	12.3	2.91	62.08	171.8
87	2	1.00	1	#NULL!	41.92	42.39	42.155	-0.47	560	559	552	3.56	12	3.87	61.12	213.03
88	2	1.00	2	#NULL!	42.57	43.03	42.8	-0.39	561	561	555	3.12	12.4	4.43	62.01	165.44
89	2	1.00	2	#NULL!	43.24	44.06	43.65	-0.11	559	559	554	3.34	12.2	3.2	59.21	166.5
90	2	1.00	2	#NULL!	43.01	44.4	43.705	-0.26	539	539	535	3.32	12.5	3.21	59.39	164.7
91	2	1.00	2	#NULL!	43.24	44.06	43.65	-0.11	559	559	554	3.34	12.3	3.2	59.21	166.5
92	2	1.00	2	#NULL!	43.01	44.4	43.705	-0.26	539	539	535	3.32	12.5	3.21	59.39	164.7
93	2	1.00	1	#NULL!	45	46.49	45.745	0.15	507	555	429	2.75	12.3	3.23	29.3	116
94	2	1.00	1	#NULL!	42.37	42.75	42.56	-0.25	545	543	540	3.43	11.09	2.56	57.29	186.77
95	2	1.00	1	#NULL!	43.33	44.46	43.895	-0.35	535	536	531	3.08	11.9	3.54	57.75	163.73
96	2	1.00	1	#NULL!	43.72	44.75	44.235	-0.37	495	498	489	2.91	11.9	3.12	57.86	136.12
97	2	1.00	1	#NULL!	43.72	44.75	44.235	-0.37	495	498	489	2.91	11.5	3.12	57.86	136.12
98	2	1.00	2	#NULL!	43.55	43.87	43.71	-0.3	552	555	549	2.98	11.5	2.37	60.81	146.34
99	2	1.00	2	#NULL!	45.55	46.32	45.935	-0.27	502	501	493	3.43	11.8	2.63	60.26	192.96
100	2	1.00	2	#NULL!	45.08	45.22	45.15	-0.31	568	573	562	2.91	12	2.47	63.9	132.94
101	2	1.00	2	#NULL!	45.55	46.32	45.935	-0.27	502	501	493	3.43	11.6	2.63	60.26	192.96
102	2	1.00	2	#NULL!	45.08	45.22	45.15	-0.31	568	573	562	2.91	12	2.47	63.9	132.94
